# Supplementary material
Source: MDPI journal article supplement (https://www.mdpi.com/2673-6918/2/4/21)
Supplement: s1 [file s1]

# Computational Study on the Conformational Preferences of Neutral, Protonated and Deprotonated Glycine Dimers

M. Luisa Pita and Ricardo A. Mosquera \*

Department of Physical Chemistry, University of Vigo, 36300 Vigo, Spain; lpita@edu.xunta.es

\* Correspondence: mosquera@uvigo.es

**Table S1.** Cartesian coordinates (in Å) obtained with MP2/6-311++G(d,p) optimizations for the most significant structures described in this paper for diverse glycine dimers. See main text for nomenclature. All coordinates are collected in standard orientation with usual Gaussian format: Center number, Atomic number, Atomic type (0 always),  $x/\text{Å}$ ,  $y/\text{Å}$ ,  $z/\text{Å}$ .

| NN-G1         |               |                        |              |              |              |
|---------------|---------------|------------------------|--------------|--------------|--------------|
| Center Number | Atomic Number | Atomic Type (0 Always) | $x/\text{Å}$ | $y/\text{Å}$ | $z/\text{Å}$ |
| 1             | 6             | 0                      | 1.904473     | 0.305780     | −0.015023    |
| 2             | 8             | 0                      | 1.203294     | 1.429388     | 0.024629     |
| 3             | 8             | 0                      | 1.414860     | −0.818018    | −0.066933    |
| 4             | 6             | 0                      | 3.403103     | 0.555949     | −0.001970    |
| 5             | 7             | 0                      | 4.243818     | −0.623255    | 0.047654     |
| 6             | 1             | 0                      | 4.016176     | −1.239310    | −0.726306    |
| 7             | 1             | 0                      | 3.619818     | 1.206567     | 0.850689     |
| 8             | 1             | 0                      | 3.636575     | 1.141091     | −0.897769    |
| 9             | 1             | 0                      | −3.619742    | −1.206653    | 0.850688     |
| 10            | 6             | 0                      | −3.403081    | −0.556019    | −0.001972    |
| 11            | 7             | 0                      | −4.243876    | 0.623130     | 0.047671     |
| 12            | 6             | 0                      | −1.904468    | −0.305747    | −0.015047    |
| 13            | 1             | 0                      | −3.636527    | −1.141173    | −0.897770    |
| 14            | 1             | 0                      | −4.016211    | 1.239249     | −0.726232    |
| 15            | 8             | 0                      | −1.414931    | 0.818084     | −0.066986    |
| 16            | 8             | 0                      | −1.203198    | −1.429295    | 0.024609     |
| 17            | 1             | 0                      | −4.048837    | 1.150790     | 0.892464     |
| 18            | 1             | 0                      | 4.048693     | −1.150958    | 0.892400     |
| 19            | 1             | 0                      | 0.237837     | 1.207242     | −0.011958    |
| 20            | 1             | 0                      | −0.237754    | −1.207019    | −0.011955    |
| NN-W1         |               |                        |              |              |              |
| Center Number | Atomic Number | Atomic Type (0 Always) | $x/\text{Å}$ | $y/\text{Å}$ | $z/\text{Å}$ |
| 1             | 6             | 0                      | 1.570198     | −0.716043    | −0.177706    |
| 2             | 8             | 0                      | 2.070092     | −1.666324    | 0.628418     |
| 3             | 8             | 0                      | 0.684062     | −0.915987    | −0.988102    |
| 4             | 6             | 0                      | 2.253265     | 0.620271     | 0.060002     |
| 5             | 7             | 0                      | 1.755519     | 1.730467     | −0.732505    |
| 6             | 1             | 0                      | 0.760975     | 1.847917     | −0.560274    |
| 7             | 1             | 0                      | 3.322512     | 0.472534     | −0.131322    |
| 8             | 1             | 0                      | 2.152186     | 1.126243     | 1.126243     |
| 9             | 1             | 0                      | −2.965874    | −0.768985    | 1.037962     |

|    |   |   |           |           |           |
|----|---|---|-----------|-----------|-----------|
| 10 | 6 | 0 | −2.095763 | −0.756199 | 0.371038  |
| 11 | 7 | 0 | −2.535396 | −0.722499 | −1.021499 |
| 12 | 6 | 0 | −1.323606 | 0.511514  | 0.709129  |
| 13 | 1 | 0 | −1.462437 | −1.609866 | 0.628695  |
| 14 | 1 | 0 | −3.469244 | −1.119889 | −1.120384 |
| 15 | 8 | 0 | −0.654070 | 0.648739  | 1.716168  |
| 16 | 8 | 0 | −1.457555 | 1.494855  | −0.185736 |
| 17 | 1 | 0 | −1.906695 | −1.261543 | −1.616223 |
| 18 | 1 | 0 | 1.850038  | 1.511672  | −1.725289 |
| 19 | 1 | 0 | −2.000874 | 1.097700  | −0.917732 |
| 20 | 1 | 0 | 1.613759  | −2.521000 | 0.415594  |

**NZ-G1**

| Center Number | Atomic Number | Atomic Type (0 Always) | x/Å       | y/Å       | z/Å       |
|---------------|---------------|------------------------|-----------|-----------|-----------|
| 1             | 6             | 0                      | 1.475881  | −0.271067 | −0.178714 |
| 2             | 8             | 0                      | 0.873452  | −1.312086 | −0.686716 |
| 3             | 8             | 0                      | 0.952831  | 0.824590  | 0.069421  |
| 4             | 6             | 0                      | 2.945975  | −0.532671 | 0.118584  |
| 5             | 7             | 0                      | 3.731979  | 0.608118  | 0.547958  |
| 6             | 1             | 0                      | 3.296764  | 1.035751  | 1.359108  |
| 7             | 1             | 0                      | 3.389195  | −0.976873 | −0.777398 |
| 8             | 1             | 0                      | 2.974838  | −1.310671 | 0.888872  |
| 9             | 1             | 0                      | −2.110469 | 1.253906  | 1.459605  |
| 10            | 6             | 0                      | −2.397547 | 0.971810  | 0.447005  |
| 11            | 7             | 0                      | −1.521459 | 1.691281  | −0.527395 |
| 12            | 6             | 0                      | −2.167808 | −0.548470 | 0.206239  |
| 13            | 1             | 0                      | −3.438890 | 1.241624  | 0.261963  |
| 14            | 1             | 0                      | −0.519233 | 1.444810  | −0.305775 |
| 15            | 8             | 0                      | −2.556199 | −1.315119 | 1.078333  |
| 16            | 8             | 0                      | −1.576515 | −0.772606 | −0.913285 |
| 17            | 1             | 0                      | −1.666070 | 2.698915  | −0.562637 |
| 18            | 1             | 0                      | 3.734481  | 1.318126  | −0.177227 |
| 19            | 1             | 0                      | −1.685213 | 1.240026  | −1.434878 |
| 20            | 1             | 0                      | −0.136602 | −1.157260 | −0.796282 |

**ZZ-G1**

| Center Number | Atomic Number | Atomic Type (0 Always) | x/Å       | y/Å       | z/Å       |
|---------------|---------------|------------------------|-----------|-----------|-----------|
| 1             | 6             | 0                      | 1.332473  | 0.931088  | −0.050049 |
| 2             | 8             | 0                      | 0.630848  | 0.852909  | −1.126897 |
| 3             | 8             | 0                      | 1.335422  | 1.821120  | 0.800351  |
| 4             | 6             | 0                      | 2.245039  | −0.299792 | 0.150357  |
| 5             | 7             | 0                      | 1.537348  | −1.475036 | −0.434486 |
| 6             | 1             | 0                      | 2.134615  | −2.286264 | −0.579386 |
| 7             | 1             | 0                      | 2.417249  | −0.479162 | 1.210606  |
| 8             | 1             | 0                      | 3.192960  | −0.148311 | −0.371914 |
| 9             | 1             | 0                      | −1.108687 | 0.963065  | 1.478589  |
| 10            | 6             | 0                      | −1.789368 | 0.506371  | 0.761811  |
| 11            | 7             | 0                      | −1.781963 | 1.327356  | −0.485101 |
| 12            | 6             | 0                      | −1.298343 | −0.892043 | 0.322578  |
| 13            | 1             | 0                      | −2.804350 | 0.457487  | 1.163368  |
| 14            | 1             | 0                      | −0.740094 | 1.322228  | −0.846567 |
| 15            | 8             | 0                      | −1.686680 | −1.266876 | −0.798599 |
| 16            | 8             | 0                      | −0.487934 | −1.469626 | 1.114943  |

|    |   |   |           |           |           |
|----|---|---|-----------|-----------|-----------|
| 17 | 1 | 0 | −2.135549 | 2.272394  | −0.351022 |
| 18 | 1 | 0 | 0.688692  | −1.705279 | 0.214577  |
| 19 | 1 | 0 | −2.328263 | 0.820516  | −1.187164 |
| 20 | 1 | 0 | 1.123683  | −1.156866 | −1.320539 |

**ZZ-W1**

| Center Number | Atomic Number | Atomic Type (0 Always) | x/Å       | y/Å       | z/Å       |
|---------------|---------------|------------------------|-----------|-----------|-----------|
| 1             | 6             | 0                      | −2.049306 | 0.505004  | 0.348083  |
| 2             | 8             | 0                      | −1.336758 | 1.137380  | −0.486606 |
| 3             | 8             | 0                      | −2.706560 | 0.974264  | 1.292829  |
| 4             | 6             | 0                      | −2.135099 | −1.023745 | 0.171455  |
| 5             | 7             | 0                      | −1.313315 | −1.500813 | −0.982707 |
| 6             | 1             | 0                      | −1.460045 | −2.505054 | −1.155690 |
| 7             | 1             | 0                      | −3.172965 | −1.315922 | 0.002364  |
| 8             | 1             | 0                      | −1.774376 | −1.525083 | 1.071442  |
| 9             | 1             | 0                      | 3.183366  | 1.303340  | −0.006729 |
| 10            | 6             | 0                      | 2.144232  | 1.021379  | 0.172375  |
| 11            | 7             | 0                      | 1.317103  | 1.506143  | −0.974797 |
| 12            | 6             | 0                      | 2.046413  | −0.506615 | 0.348640  |
| 13            | 1             | 0                      | 1.797432  | 1.526147  | 1.075762  |
| 14            | 1             | 0                      | 1.462994  | 2.511578  | −1.141711 |
| 15            | 8             | 0                      | 2.692247  | −0.980319 | 1.298825  |
| 16            | 8             | 0                      | 1.337912  | −1.134258 | −0.493176 |
| 17            | 1             | 0                      | 0.294173  | 1.345318  | −0.797686 |
| 18            | 1             | 0                      | −0.289486 | −1.341426 | −0.808128 |
| 19            | 1             | 0                      | 1.564736  | 1.000822  | −1.835987 |
| 20            | 1             | 0                      | −1.564513 | −0.989705 | −1.839412 |

**NA-G1**

| Center Number | Atomic Number | Atomic Type (0 Always) | x/Å       | y/Å       | z/Å       |
|---------------|---------------|------------------------|-----------|-----------|-----------|
| 1             | 6             | 0                      | 1.597382  | −0.264875 | −0.046468 |
| 2             | 8             | 0                      | 0.742476  | −1.094390 | 0.395015  |
| 3             | 8             | 0                      | 1.371672  | 0.788696  | −0.675712 |
| 4             | 6             | 0                      | 3.072654  | −0.649961 | 0.216296  |
| 5             | 7             | 0                      | 4.067373  | 0.401621  | −0.033701 |
| 6             | 1             | 0                      | 3.996370  | 1.090103  | 0.711171  |
| 7             | 1             | 0                      | 3.292966  | −1.511299 | −0.425651 |
| 8             | 1             | 0                      | 3.162766  | −1.008750 | 1.244799  |
| 9             | 1             | 0                      | −1.265670 | 0.463521  | 1.525727  |
| 10            | 6             | 0                      | −2.009275 | 0.809058  | 0.803034  |
| 11            | 7             | 0                      | −1.385907 | 1.855020  | −0.015828 |
| 12            | 6             | 0                      | −2.549802 | −0.385281 | 0.000585  |
| 13            | 1             | 0                      | −2.859328 | 1.228343  | 1.347914  |
| 14            | 1             | 0                      | −0.474840 | 1.541669  | −0.364079 |
| 15            | 8             | 0                      | −3.735415 | −0.472449 | −0.277359 |
| 16            | 8             | 0                      | −1.673131 | −1.285465 | −0.412866 |
| 17            | 1             | 0                      | 3.751706  | 0.905683  | −0.861093 |
| 18            | 1             | 0                      | −1.975039 | 2.069791  | −0.814424 |
| 19            | 1             | 0                      | −0.709768 | −1.120324 | −0.090975 |

**NA-G2**

| Center Number | Atomic Number | Atomic Type (0 Always) | x/Å       | y/Å       | z/Å       |
|---------------|---------------|------------------------|-----------|-----------|-----------|
| 1             | 6             | 0                      | −1.715355 | −0.243879 | −0.057195 |
| 2             | 8             | 0                      | −0.974102 | −1.142097 | 0.458535  |

|    |   |   |           |           |           |
|----|---|---|-----------|-----------|-----------|
| 3  | 8 | 0 | −1.360088 | 0.699608  | −0.787048 |
| 4  | 6 | 0 | −3.222857 | −0.397496 | 0.259415  |
| 5  | 7 | 0 | −4.071909 | 0.747876  | −0.096051 |
| 6  | 1 | 0 | −3.694777 | 1.124629  | −0.964744 |
| 7  | 1 | 0 | −3.337579 | −0.629121 | 1.321469  |
| 8  | 1 | 0 | −3.570911 | −1.284248 | −0.283849 |
| 9  | 1 | 0 | 1.541926  | 0.625634  | 1.525323  |
| 10 | 6 | 0 | 1.753812  | 0.787460  | 0.460815  |
| 11 | 7 | 0 | 2.670987  | 1.919855  | 0.306853  |
| 12 | 6 | 0 | 2.297615  | −0.541975 | −0.081071 |
| 13 | 1 | 0 | 0.790740  | 1.004148  | −0.009012 |
| 14 | 1 | 0 | 2.556244  | 2.309936  | −0.623566 |
| 15 | 8 | 0 | 3.471564  | −0.663675 | −0.396551 |
| 16 | 8 | 0 | 1.446127  | −1.543489 | −0.141715 |
| 17 | 1 | 0 | 3.620728  | 1.554137  | 0.329547  |
| 18 | 1 | 0 | −3.906907 | 1.488329  | 0.580953  |
| 19 | 1 | 0 | 0.459690  | −1.294986 | 0.090713  |

## NA-W1

| Center Number | Atomic Number | Atomic Type (0 Always) | $x/\text{\AA}$ | $y/\text{\AA}$ | $z/\text{\AA}$ |
|---------------|---------------|------------------------|----------------|----------------|----------------|
| 1             | 6             | 0                      | 2.137921       | 0.098825       | 0.066351       |
| 2             | 8             | 0                      | 1.162098       | −0.584816      | 0.629827       |
| 3             | 8             | 0                      | 1.995391       | 1.170429       | −0.505631      |
| 4             | 6             | 0                      | 3.489594       | −0.604426      | 0.204576       |
| 5             | 7             | 0                      | 4.641354       | 0.070701       | −0.372921      |
| 6             | 1             | 0                      | 4.762986       | 0.989121       | 0.054855       |
| 7             | 1             | 0                      | 3.381785       | −1.598824      | −0.242670      |
| 8             | 1             | 0                      | 3.658699       | −0.773786      | 1.273543       |
| 9             | 1             | 0                      | −3.315606      | 1.649883       | −0.112553      |
| 10            | 6             | 0                      | −3.460817      | 0.630434       | 0.261464       |
| 11            | 7             | 0                      | −4.654542      | 0.057773       | −0.354905      |
| 12            | 6             | 0                      | −2.124670      | −0.116080      | 0.069574       |
| 13            | 1             | 0                      | −3.624363      | 0.728399       | 1.339990       |
| 14            | 1             | 0                      | −4.507474      | −0.040629      | −1.359786      |
| 15            | 8             | 0                      | −2.085053      | −1.165797      | −0.599622      |
| 16            | 8             | 0                      | −1.124393      | 0.440575       | 0.644404       |
| 17            | 1             | 0                      | 4.490034       | 0.237200       | −1.368198      |
| 18            | 1             | 0                      | −4.799649      | −0.889997      | −0.005595      |
| 19            | 1             | 0                      | 0.209392       | −0.136341      | 0.551576       |

## NA-W2

| Center Number | Atomic Number | Atomic Type (0 Always) | $x/\text{\AA}$ | $y/\text{\AA}$ | $z/\text{\AA}$ |
|---------------|---------------|------------------------|----------------|----------------|----------------|
| 1             | 6             | 0                      | −2.183356      | 0.553188       | −0.118522      |
| 2             | 8             | 0                      | −1.304177      | −0.239375      | 0.355181       |
| 3             | 8             | 0                      | −1.969521      | 1.712829       | −0.535104      |
| 4             | 6             | 0                      | −3.639773      | 0.046486       | −0.174225      |
| 5             | 7             | 0                      | −3.918318      | −1.329032      | 0.233554       |
| 6             | 1             | 0                      | −3.565593      | −1.482174      | 1.178647       |
| 7             | 1             | 0                      | −3.989573      | 0.193707       | −1.201312      |
| 8             | 1             | 0                      | −4.232243      | 0.730080       | 0.444356       |
| 9             | 1             | 0                      | 3.522795       | 0.255220       | 1.509719       |
| 10            | 6             | 0                      | 3.417468       | 0.382373       | 0.426819       |
| 11            | 7             | 0                      | 4.545184       | −0.238691      | −0.250304      |

|    |   |   |           |           |           |
|----|---|---|-----------|-----------|-----------|
| 12 | 6 | 0 | 2.023983  | −0.120688 | 0.047202  |
| 13 | 1 | 0 | 3.429105  | 1.463361  | 0.248864  |
| 14 | 1 | 0 | 1.828116  | −0.991536 | −0.787976 |
| 15 | 8 | 0 | 1.073939  | 0.494588  | 0.724017  |
| 16 | 8 | 0 | 4.446389  | −0.141030 | −1.261266 |
| 17 | 1 | 0 | −3.395076 | −1.973701 | −0.359748 |
| 18 | 1 | 0 | 0.098410  | 0.189638  | 0.482055  |
| 19 | 1 | 0 | 4.560950  | −1.241247 | −0.060658 |

**ZA-G1**

| Center Number | Atomic Number | Atomic Type (0 Always) | $x/\text{\AA}$ | $y/\text{\AA}$ | $z/\text{\AA}$ |
|---------------|---------------|------------------------|----------------|----------------|----------------|
| 1             | 6             | 0                      | −3.399001      | −0.087864      | −0.016033      |
| 2             | 8             | 0                      | −4.391892      | −0.011802      | −0.752619      |
| 3             | 8             | 0                      | −3.303740      | −0.303208      | 1.222195       |
| 4             | 6             | 0                      | −2.015326      | 0.120703       | −0.732497      |
| 5             | 7             | 0                      | −0.933299      | −0.029056      | 0.283071       |
| 6             | 1             | 0                      | −0.258138      | 0.770898       | 0.361005       |
| 7             | 1             | 0                      | −1.974345      | 1.116972       | −1.171853      |
| 8             | 1             | 0                      | −1.891660      | −0.615366      | −1.525867      |
| 9             | 1             | 0                      | 3.968860       | 1.157176       | 0.665450       |
| 10            | 6             | 0                      | 3.625193       | 0.482346       | −0.122579      |
| 11            | 7             | 0                      | 4.457754       | −0.726481      | −0.140617      |
| 12            | 6             | 0                      | 2.103547       | 0.266574       | 0.047063       |
| 13            | 1             | 0                      | 3.761398       | 1.025054       | −1.065676      |
| 14            | 1             | 0                      | 1.422495       | 1.304255       | 0.287060       |
| 15            | 8             | 0                      | 1.665422       | −0.906791      | −0.095852      |
| 16            | 8             | 0                      | 3.940267       | −1.430671      | −0.663710      |
| 17            | 1             | 0                      | −0.256908      | −0.790278      | 0.101365       |
| 18            | 1             | 0                      | 4.497177       | −1.102450      | 0.803105       |
| 19            | 1             | 0                      | −1.482578      | −0.192768      | 1.157009       |

**ZA-G2**

| Center Number | Atomic Number | Atomic Type (0 Always) | $x/\text{\AA}$ | $y/\text{\AA}$ | $z/\text{\AA}$ |
|---------------|---------------|------------------------|----------------|----------------|----------------|
| 1             | 6             | 0                      | −3.397741      | −0.089292      | −0.015407      |
| 2             | 8             | 0                      | −3.302511      | −0.294880      | 1.224509       |
| 3             | 8             | 0                      | −4.390603      | −0.019898      | −0.752690      |
| 4             | 6             | 0                      | −2.014115      | 0.113960       | −0.733387      |
| 5             | 7             | 0                      | −0.932454      | −0.022333      | 0.284390       |
| 6             | 1             | 0                      | −0.249581      | −0.779995      | 0.108596       |
| 7             | 1             | 0                      | −1.974750      | 1.104877       | −1.184759      |
| 8             | 1             | 0                      | −1.888836      | −0.631428      | −1.517849      |
| 9             | 1             | 0                      | 3.972103       | 1.158488       | 0.654806       |
| 10            | 6             | 0                      | 3.625633       | 0.477938       | −0.127049      |
| 11            | 7             | 0                      | 4.453403       | −0.734368      | −0.134264      |
| 12            | 6             | 0                      | 2.103150       | 0.269678       | 0.044629       |
| 13            | 1             | 0                      | 3.763793       | 1.011409       | −1.075125      |
| 14            | 1             | 0                      | 4.491472       | −1.101886      | 0.812833       |
| 15            | 8             | 0                      | 1.660844       | −0.903465      | −0.090183      |
| 16            | 8             | 0                      | 1.426001       | 1.311134       | 0.277438       |
| 17            | 1             | 0                      | −1.481798      | −0.182506      | 1.158996       |
| 18            | 1             | 0                      | 3.933093       | −1.441083      | −0.651088      |
| 19            | 1             | 0                      | −0.263537      | 0.782192       | 0.357406       |

**ZA-W1**

| Center Number | Atomic Number | Atomic Type (0 Always) | x/Å       | y/Å       | z/Å       |
|---------------|---------------|------------------------|-----------|-----------|-----------|
| 1             | 6             | 0                      | 3.144312  | −0.076919 | −0.118278 |
| 2             | 8             | 0                      | 3.260506  | −0.061511 | 1.134145  |
| 3             | 8             | 0                      | 4.046550  | 0.032561  | −0.978072 |
| 4             | 6             | 0                      | 1.710004  | −0.249898 | −0.675783 |
| 5             | 7             | 0                      | 0.719781  | −0.343314 | 0.434091  |
| 6             | 1             | 0                      | 0.170395  | −1.207852 | 0.428815  |
| 7             | 1             | 0                      | 1.663189  | −1.150077 | −1.289737 |
| 8             | 1             | 0                      | 1.463696  | 0.607513  | −1.305255 |
| 9             | 1             | 0                      | −3.378044 | 1.655695  | −0.187289 |
| 10            | 6             | 0                      | −2.477701 | 1.051923  | −0.353259 |
| 11            | 7             | 0                      | −1.313501 | 1.552562  | 0.400578  |
| 12            | 6             | 0                      | −2.841589 | −0.419749 | −0.053223 |
| 13            | 1             | 0                      | −2.250014 | 1.116677  | −1.422335 |
| 14            | 1             | 0                      | −1.069651 | 2.490879  | 0.075030  |
| 15            | 8             | 0                      | −3.900281 | −0.829294 | −0.599687 |
| 16            | 8             | 0                      | −2.074741 | −1.091905 | 0.686091  |
| 17            | 1             | 0                      | −0.016827 | 0.442124  | 0.420138  |
| 18            | 1             | 0                      | −1.556294 | 1.647498  | 1.389632  |
| 19            | 1             | 0                      | 1.263167  | −0.298145 | 1.311755  |

**ZA-W2**

| Center Number | Atomic Number | Atomic Type (0 Always) | x/Å       | y/Å       | z/Å       |
|---------------|---------------|------------------------|-----------|-----------|-----------|
| 1             | 6             | 0                      | 3.203506  | 0.146069  | 0.026282  |
| 2             | 8             | 0                      | 3.949625  | 1.029451  | −0.458622 |
| 3             | 8             | 0                      | 3.460837  | −0.649328 | 0.964898  |
| 4             | 6             | 0                      | 1.792141  | 0.060709  | −0.592706 |
| 5             | 7             | 0                      | 1.058615  | −1.161252 | −0.154480 |
| 6             | 1             | 0                      | 1.290906  | −1.973945 | −0.742967 |
| 7             | 1             | 0                      | 1.849411  | 0.066777  | −1.681407 |
| 8             | 1             | 0                      | 1.199505  | 0.920239  | −0.272695 |
| 9             | 1             | 0                      | −3.699732 | 1.450688  | −0.546083 |
| 10            | 6             | 0                      | −3.507034 | 0.629576  | 0.153193  |
| 11            | 7             | 0                      | −4.413749 | −0.477212 | −0.145324 |
| 12            | 6             | 0                      | −1.985793 | 0.366813  | 0.124349  |
| 13            | 1             | 0                      | −3.741424 | 1.024038  | 1.147785  |
| 14            | 1             | 0                      | −4.192568 | −0.861719 | −1.064144 |
| 15            | 8             | 0                      | −1.238746 | 1.331226  | 0.410844  |
| 16            | 8             | 0                      | −1.589383 | −0.802240 | −0.186789 |
| 17            | 1             | 0                      | −4.251113 | −1.238666 | 0.514122  |
| 18            | 1             | 0                      | −0.007425 | −1.011693 | −0.167615 |
| 19            | 1             | 0                      | 1.362789  | −1.398345 | 0.802268  |

**NC-G1**

| Center Number | Atomic Number | Atomic Type (0 Always) | x/Å       | y/Å       | z/Å       |
|---------------|---------------|------------------------|-----------|-----------|-----------|
| 1             | 6             | 0                      | −1.982099 | −0.472090 | 0.152869  |
| 2             | 8             | 0                      | −2.903092 | −1.389741 | −0.138178 |
| 3             | 8             | 0                      | −1.369535 | −0.414199 | 1.203064  |
| 4             | 6             | 0                      | −1.767097 | 0.475162  | −1.011697 |
| 5             | 7             | 0                      | −1.026912 | 1.666253  | −0.564948 |
| 6             | 1             | 0                      | −1.682189 | 2.349560  | −0.187488 |
| 7             | 1             | 0                      | −2.732444 | 0.704241  | −1.472090 |
| 8             | 1             | 0                      | −1.168791 | −0.056954 | −1.758093 |

|    |   |   |           |           |           |
|----|---|---|-----------|-----------|-----------|
| 9  | 1 | 0 | 2.565061  | −0.146544 | 1.722899  |
| 10 | 6 | 0 | 1.667466  | −0.127793 | 1.101617  |
| 11 | 7 | 0 | 0.955978  | 1.167148  | 1.259667  |
| 12 | 6 | 0 | 2.025474  | −0.313198 | −0.361604 |
| 13 | 1 | 0 | 0.997291  | −0.926527 | 1.421367  |
| 14 | 1 | 0 | 0.501691  | 1.202311  | 2.174263  |
| 15 | 8 | 0 | 1.675671  | 0.450354  | −1.234464 |
| 16 | 8 | 0 | 2.746733  | −1.420976 | −0.521560 |
| 17 | 1 | 0 | −0.595177 | 2.104585  | −1.376590 |
| 18 | 1 | 0 | −2.980807 | −1.991494 | 0.619314  |
| 19 | 1 | 0 | 1.606125  | 1.952563  | 1.188567  |
| 20 | 1 | 0 | 0.166635  | 1.313924  | 0.511343  |
| 21 | 1 | 0 | 2.958470  | −1.515455 | −1.464524 |

**NC-G2**

| Center Number | Atomic Number | Atomic Type (0 Always) | x/Å       | y/Å       | z/Å       |
|---------------|---------------|------------------------|-----------|-----------|-----------|
| 1             | 6             | 0                      | −2.434238 | −0.567273 | −0.183834 |
| 2             | 8             | 0                      | −3.320893 | −1.338706 | 0.437432  |
| 3             | 8             | 0                      | −1.671005 | −0.895291 | −1.063776 |
| 4             | 6             | 0                      | −2.500815 | 0.858036  | 0.341717  |
| 5             | 7             | 0                      | −1.325608 | 1.580994  | −0.213463 |
| 6             | 1             | 0                      | −1.414353 | 2.592882  | −0.109184 |
| 7             | 1             | 0                      | −2.451839 | 0.878748  | 1.431215  |
| 8             | 1             | 0                      | −3.427111 | 1.332497  | 0.010860  |
| 9             | 1             | 0                      | 2.512679  | −1.560932 | 1.041684  |
| 10            | 6             | 0                      | 2.884418  | −0.578256 | 0.739119  |
| 11            | 7             | 0                      | 3.823409  | −0.645843 | −0.382020 |
| 12            | 6             | 0                      | 1.681694  | 0.251665  | 0.308407  |
| 13            | 1             | 0                      | 3.310751  | −0.104016 | 1.627180  |
| 14            | 1             | 0                      | 0.727295  | 0.491970  | 1.043554  |
| 15            | 8             | 0                      | 1.739684  | 0.699393  | −0.929407 |
| 16            | 8             | 0                      | 4.721122  | −0.232484 | −0.155109 |
| 17            | 1             | 0                      | −1.212627 | 1.348783  | −1.205933 |
| 18            | 1             | 0                      | −3.278873 | −2.227731 | 0.049128  |
| 19            | 1             | 0                      | 3.991922  | −1.598899 | −0.684261 |
| 20            | 1             | 0                      | 2.616977  | 0.342041  | −1.253293 |
| 21            | 1             | 0                      | −0.440262 | 1.239084  | 0.281214  |

**NC-W1**

| Center Number | Atomic Number | Atomic Type (0 Always) | x/Å       | y/Å       | z/Å       |
|---------------|---------------|------------------------|-----------|-----------|-----------|
| 1             | 6             | 0                      | −2.140858 | −0.110195 | −0.190371 |
| 2             | 8             | 0                      | −2.902380 | −1.178180 | −0.452799 |
| 3             | 8             | 0                      | −1.936001 | 0.798433  | −0.972558 |
| 4             | 6             | 0                      | −1.575674 | −0.176538 | 1.212011  |
| 5             | 7             | 0                      | −0.666480 | 0.947387  | 1.452978  |
| 6             | 1             | 0                      | −0.132066 | 0.761746  | 2.308117  |
| 7             | 1             | 0                      | −1.029595 | −1.119271 | 1.312244  |
| 8             | 1             | 0                      | −2.420934 | −0.212324 | 1.911764  |
| 9             | 1             | 0                      | 3.001013  | 1.003291  | −1.115522 |
| 10            | 6             | 0                      | 2.283060  | 0.858302  | −0.301841 |
| 11            | 7             | 0                      | 0.997891  | 1.506101  | −0.650141 |
| 12            | 6             | 0                      | 2.122374  | −0.631160 | −0.067233 |
| 13            | 1             | 0                      | 2.676761  | 1.320756  | 0.605848  |

|    |   |   |           |           |           |
|----|---|---|-----------|-----------|-----------|
| 14 | 1 | 0 | 2.943537  | −1.286369 | 0.536143  |
| 15 | 8 | 0 | 1.009941  | −1.106847 | −0.634376 |
| 16 | 8 | 0 | 0.278746  | 1.314938  | 0.135924  |
| 17 | 1 | 0 | −1.209320 | 1.797079  | 1.641110  |
| 18 | 1 | 0 | −3.260678 | −1.080286 | −1.373745 |
| 19 | 1 | 0 | 0.624942  | 1.148732  | −1.538966 |
| 20 | 1 | 0 | 0.974742  | −2.092129 | −0.482060 |
| 21 | 1 | 0 | 1.122317  | 2.524301  | −0.751253 |

**NC-W2**

| Center Number | Atomic Number | Atomic Type (0 Always) | x/Å       | y/Å       | z/Å       |
|---------------|---------------|------------------------|-----------|-----------|-----------|
| 1             | 6             | 0                      | 2.889724  | −0.168166 | 0.091398  |
| 2             | 8             | 0                      | 3.714225  | −0.408979 | −0.936021 |
| 3             | 8             | 0                      | 3.162040  | −0.375025 | 1.257195  |
| 4             | 6             | 0                      | 1.566442  | 0.390053  | −0.398261 |
| 5             | 7             | 0                      | 0.655181  | 0.796405  | 0.668752  |
| 6             | 1             | 0                      | 1.098846  | 1.522707  | 1.241434  |
| 7             | 1             | 0                      | 1.089124  | −0.380687 | −1.012892 |
| 8             | 1             | 0                      | 1.775160  | 1.243645  | −1.051856 |
| 9             | 1             | 0                      | −2.795158 | 0.990305  | 1.302009  |
| 10            | 6             | 0                      | −2.780494 | 0.793141  | 0.227275  |
| 11            | 7             | 0                      | −1.715338 | 1.617340  | −0.390886 |
| 12            | 6             | 0                      | −2.570254 | −0.693221 | 0.007332  |
| 13            | 1             | 0                      | −3.751477 | 1.069888  | −0.194714 |
| 14            | 1             | 0                      | −0.745342 | 1.333330  | 0.019292  |
| 15            | 8             | 0                      | −3.218236 | −1.527101 | 0.600921  |
| 16            | 8             | 0                      | −1.632639 | −0.939539 | −0.909811 |
| 17            | 1             | 0                      | 0.501031  | 0.003831  | 1.301918  |
| 18            | 1             | 0                      | −1.699494 | 1.501300  | −1.413955 |
| 19            | 1             | 0                      | 4.553122  | −0.795928 | −0.572372 |
| 20            | 1             | 0                      | −1.561452 | −1.926917 | −1.031182 |
| 21            | 1             | 0                      | −1.878885 | 2.616620  | −0.197479 |

**NC-W3**

| Center Number | Atomic Number | Atomic Type (0 Always) | x/Å       | y/Å       | z/Å       |
|---------------|---------------|------------------------|-----------|-----------|-----------|
| 1             | 6             | 0                      | 2.239264  | 0.565511  | 0.168317  |
| 2             | 8             | 0                      | 2.972679  | 1.516970  | −0.397134 |
| 3             | 8             | 0                      | 1.480511  | 0.703778  | 1.106421  |
| 4             | 6             | 0                      | 2.458126  | −0.761302 | −0.529457 |
| 5             | 7             | 0                      | 1.631560  | −1.801855 | 0.124461  |
| 6             | 1             | 0                      | 1.763024  | −2.718362 | −0.342295 |
| 7             | 1             | 0                      | 3.511426  | −1.048772 | −0.474862 |
| 8             | 1             | 0                      | 2.162547  | −0.686796 | −1.580098 |
| 9             | 1             | 0                      | −1.373795 | 0.960337  | −1.395741 |
| 10            | 6             | 0                      | −1.663551 | 0.911912  | −0.338346 |
| 11            | 7             | 0                      | −2.688562 | 1.904116  | −0.068540 |
| 12            | 6             | 0                      | −1.985713 | −0.549615 | −0.076028 |
| 13            | 1             | 0                      | −0.764633 | 1.132654  | 0.242286  |
| 14            | 1             | 0                      | −1.129924 | −1.427886 | −0.068007 |
| 15            | 8             | 0                      | −3.276634 | −0.797020 | 0.105916  |
| 16            | 8             | 0                      | −2.961240 | 1.866040  | 0.914570  |
| 17            | 1             | 0                      | 0.621587  | −1.564688 | 0.081969  |
| 18            | 1             | 0                      | 2.799747  | 2.373787  | 0.081488  |



|    |   |   |           |           |           |
|----|---|---|-----------|-----------|-----------|
| 19 | 1 | 0 | −3.527190 | 1.700240  | −0.613099 |
| 20 | 1 | 0 | −3.383952 | −1.776193 | 0.248718  |
| 21 | 1 | 0 | 1.889686  | −1.919856 | 1.121139  |

**ZC-G1**

| Center Number | Atomic Number | Atomic Type (0 Always) | x/Å       | y/Å       | z/Å       |
|---------------|---------------|------------------------|-----------|-----------|-----------|
| 1             | 6             | 0                      | 2.896770  | −0.315089 | 0.083536  |
| 2             | 8             | 0                      | 3.522204  | −1.280237 | −0.588964 |
| 3             | 8             | 0                      | 3.209721  | 0.124178  | 1.167600  |
| 4             | 6             | 0                      | 1.673915  | 0.170057  | −0.673508 |
| 5             | 7             | 0                      | 1.152642  | 1.385259  | 0.002098  |
| 6             | 1             | 0                      | 1.584218  | 2.234710  | −0.364010 |
| 7             | 1             | 0                      | 0.894360  | −0.595525 | −0.629601 |
| 8             | 1             | 0                      | 1.909277  | 0.386272  | −1.715882 |
| 9             | 1             | 0                      | −3.860797 | 0.554241  | −1.006800 |
| 10            | 6             | 0                      | −3.455581 | 0.241686  | −0.045102 |
| 11            | 7             | 0                      | −3.760240 | −1.205979 | 0.204790  |
| 12            | 6             | 0                      | −1.910446 | 0.320633  | −0.044195 |
| 13            | 1             | 0                      | −3.876070 | 0.859381  | 0.747569  |
| 14            | 1             | 0                      | −4.258299 | −1.657575 | −0.562187 |
| 15            | 8             | 0                      | −1.417935 | 1.456947  | −0.238964 |
| 16            | 8             | 0                      | −1.323297 | −0.773877 | 0.155811  |
| 17            | 1             | 0                      | 1.410645  | 1.330068  | 0.994552  |
| 18            | 1             | 0                      | −2.760228 | −1.579958 | 0.281187  |
| 19            | 1             | 0                      | 4.270724  | −1.584794 | −0.051087 |
| 20            | 1             | 0                      | −4.274662 | −1.371929 | 1.069757  |
| 21            | 1             | 0                      | 0.060524  | 1.450330  | −0.099970 |

**ZC-G2**

| Center Number | Atomic Number | Atomic Type (0 Always) | x/Å       | y/Å       | z/Å       |
|---------------|---------------|------------------------|-----------|-----------|-----------|
| 1             | 6             | 0                      | 2.434676  | −0.554128 | −0.152404 |
| 2             | 8             | 0                      | 3.425151  | −1.187434 | 0.477102  |
| 3             | 8             | 0                      | 1.632586  | −1.046976 | −0.912328 |
| 4             | 6             | 0                      | 2.446898  | 0.926447  | 0.185254  |
| 5             | 7             | 0                      | 1.179596  | 1.509587  | −0.311475 |
| 6             | 1             | 0                      | 1.216467  | 2.528518  | −0.340597 |
| 7             | 1             | 0                      | 0.965792  | 1.156701  | −1.249371 |
| 8             | 1             | 0                      | 3.307353  | 1.398714  | −0.294819 |
| 9             | 1             | 0                      | 2.514278  | 1.075767  | 1.263940  |
| 10            | 6             | 0                      | −3.354228 | 0.031172  | 1.591651  |
| 11            | 7             | 0                      | −2.836776 | −0.510896 | 0.800902  |
| 12            | 6             | 0                      | −3.728198 | −0.674705 | −0.393793 |
| 13            | 1             | 0                      | −1.631739 | 0.299625  | 0.268449  |
| 14            | 1             | 0                      | −2.516349 | −1.483954 | 1.171456  |
| 15            | 8             | 0                      | −4.638742 | −0.227496 | −0.289191 |
| 16            | 8             | 0                      | −3.130496 | −0.156405 | −1.119436 |
| 17            | 1             | 0                      | −1.686746 | 0.595454  | −0.950272 |
| 18            | 1             | 0                      | −0.730448 | 0.570754  | 1.101869  |
| 19            | 1             | 0                      | −3.870605 | −1.646464 | −0.668272 |
| 20            | 1             | 0                      | 0.332854  | 1.176037  | 0.327029  |
| 21            | 1             | 0                      | 3.411201  | −2.117434 | 0.200312  |

**ZC-W1**

| Center Number | Atomic Number | Atomic Type (0 Always) | x/Å | y/Å | z/Å |
|---------------|---------------|------------------------|-----|-----|-----|
|---------------|---------------|------------------------|-----|-----|-----|

|    |   |   |           |           |           |
|----|---|---|-----------|-----------|-----------|
| 1  | 6 | 0 | 1.937460  | −0.818709 | 0.122903  |
| 2  | 8 | 0 | 1.704178  | −0.413905 | 1.373314  |
| 3  | 8 | 0 | 2.024601  | −1.971930 | −0.239992 |
| 4  | 6 | 0 | 2.172839  | 0.343876  | −0.817359 |
| 5  | 7 | 0 | 1.724608  | 1.637337  | −0.251732 |
| 6  | 1 | 0 | 2.238010  | 1.865411  | 0.614853  |
| 7  | 1 | 0 | 1.904369  | 2.401624  | −0.924351 |
| 8  | 1 | 0 | 1.625391  | 0.156507  | −1.740495 |
| 9  | 1 | 0 | 3.244552  | 0.400792  | −1.033266 |
| 10 | 6 | 0 | −3.440987 | 1.110166  | 0.065025  |
| 11 | 7 | 0 | −2.804864 | 0.281536  | 0.381347  |
| 12 | 6 | 0 | −3.317646 | −0.968325 | −0.246848 |
| 13 | 1 | 0 | −1.346869 | 0.512588  | −0.033462 |
| 14 | 1 | 0 | −2.872739 | 0.165100  | 1.465774  |
| 15 | 8 | 0 | −4.258803 | −1.214257 | 0.096220  |
| 16 | 8 | 0 | −3.366006 | −0.875430 | −1.272466 |
| 17 | 1 | 0 | −0.862767 | 1.625593  | 0.335790  |
| 18 | 1 | 0 | −0.771283 | −0.398095 | −0.664990 |
| 19 | 1 | 0 | −2.679188 | −1.754135 | −0.053482 |
| 20 | 1 | 0 | 0.673065  | 1.630224  | −0.024857 |
| 21 | 1 | 0 | 1.574371  | −1.218139 | 1.943548  |

**ZC-W2**

| Center Number | Atomic Number | Atomic Type (0 Always) | $x/\text{\AA}$ | $y/\text{\AA}$ | $z/\text{\AA}$ |
|---------------|---------------|------------------------|----------------|----------------|----------------|
| 1             | 6             | 0                      | −1.917383      | −0.826207      | 0.116913       |
| 2             | 8             | 0                      | −1.649185      | −0.457895      | 1.370933       |
| 3             | 8             | 0                      | −2.007068      | −1.968915      | −0.277476      |
| 4             | 6             | 0                      | −2.187383      | 0.359072       | −0.784953      |
| 5             | 7             | 0                      | −1.733641      | 1.641623       | −0.199215      |
| 6             | 1             | 0                      | −1.938442      | 2.421856       | −0.846453      |
| 7             | 1             | 0                      | −2.224801      | 1.842913       | 0.686399       |
| 8             | 1             | 0                      | 2.971586       | 0.358765       | 1.384908       |
| 9             | 1             | 0                      | 2.832887       | 0.315743       | 0.303441       |
| 10            | 6             | 0                      | 3.237692       | −1.033345      | −0.192221      |
| 11            | 7             | 0                      | 1.354084       | 0.543139       | −0.053936      |
| 12            | 6             | 0                      | 3.455165       | 1.075759       | −0.172106      |
| 13            | 1             | 0                      | 3.514733       | −1.670271      | 0.568250       |
| 14            | 1             | 0                      | 2.398359       | −1.425736      | −0.662613      |
| 15            | 8             | 0                      | 0.765413       | −0.375277      | −0.668579      |
| 16            | 8             | 0                      | 0.876778       | 1.653379       | 0.318879       |
| 17            | 1             | 0                      | 4.013077       | −0.994966      | −0.868891      |
| 18            | 1             | 0                      | −0.679874      | 1.638625       | −0.000538      |
| 19            | 1             | 0                      | −1.663426      | 0.199392       | −1.726941      |
| 20            | 1             | 0                      | −3.264852      | 0.413723       | −0.971195      |
| 21            | 1             | 0                      | −1.490610      | −1.278821      | 1.910384       |

**ZC-W3**

| Center Number | Atomic Number | Atomic Type (0 Always) | $x/\text{\AA}$ | $y/\text{\AA}$ | $z/\text{\AA}$ |
|---------------|---------------|------------------------|----------------|----------------|----------------|
| 1             | 6             | 0                      | 2.244448       | 0.589173       | 0.103702       |
| 2             | 8             | 0                      | 3.056458       | 1.382346       | −0.585943      |
| 3             | 8             | 0                      | 1.440533       | 0.944289       | 0.942963       |
| 4             | 6             | 0                      | 2.453745       | −0.857798      | −0.289448      |
| 5             | 7             | 0                      | 1.491031       | −1.714162      | 0.433904       |

---

|    |   |   |           |           |           |
|----|---|---|-----------|-----------|-----------|
| 6  | 1 | 0 | 1.680280  | −2.713174 | 0.239828  |
| 7  | 1 | 0 | 3.474900  | −1.159893 | −0.039681 |
| 8  | 1 | 0 | 2.300695  | −0.982912 | −1.364973 |
| 9  | 1 | 0 | −1.581362 | 1.055127  | −1.421871 |
| 10 | 6 | 0 | −1.684988 | 0.821636  | −0.358616 |
| 11 | 7 | 0 | −2.808489 | 1.639883  | 0.176607  |
| 12 | 6 | 0 | −2.001414 | −0.672708 | −0.193607 |
| 13 | 1 | 0 | −0.770079 | 1.098673  | 0.162792  |
| 14 | 1 | 0 | −1.021657 | −1.450018 | −0.399742 |
| 15 | 8 | 0 | −3.179094 | −0.974706 | 0.084303  |
| 16 | 8 | 0 | −2.867076 | 1.567377  | 1.203481  |
| 17 | 1 | 0 | 0.495159  | −1.513786 | 0.139130  |
| 18 | 1 | 0 | 2.902241  | 2.322033  | −0.293099 |
| 19 | 1 | 0 | −3.704151 | 1.289982  | −0.195225 |
| 20 | 1 | 0 | 1.563416  | −1.578325 | 1.456933  |
| 21 | 1 | 0 | −2.712478 | 2.637744  | −0.065717 |

---
